# Supplementary material
Source: Springer Nature journal article supplement (https://www.springermedizin.de/resource/supplementary/12967_2011_993_MOESM7_ESM.pdf/9577252)

**A**

# Threshold of Integration

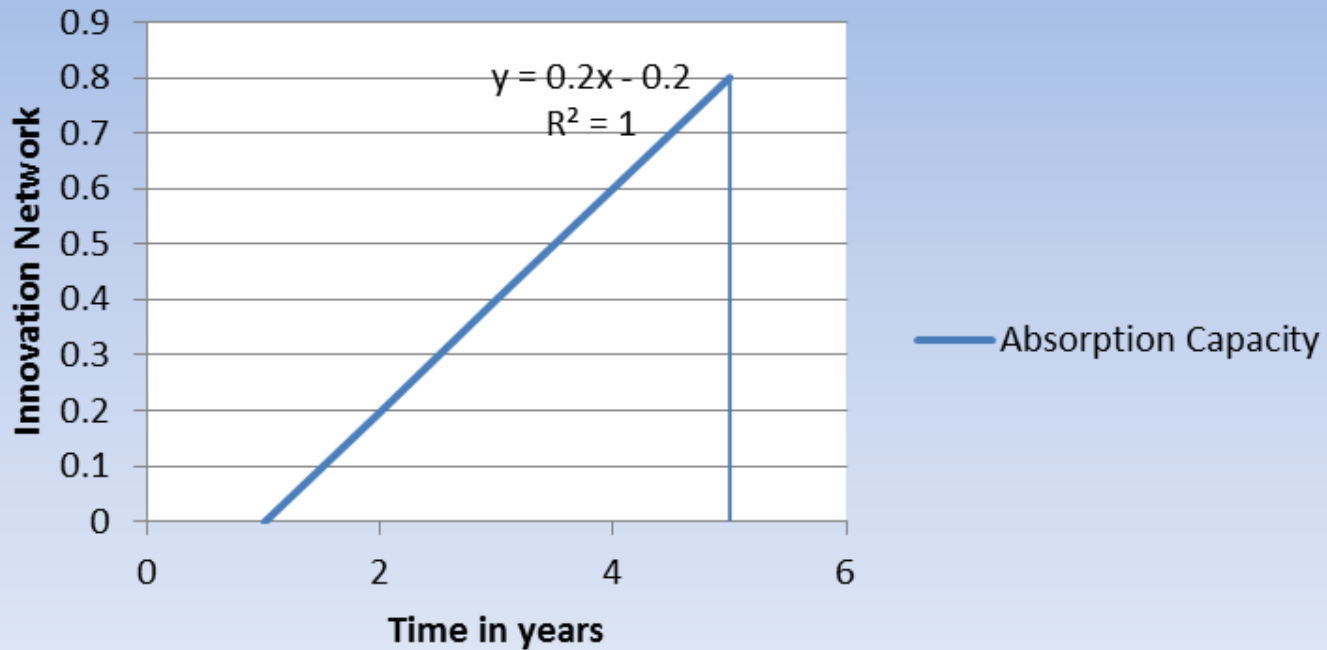**B**

# Threshold of Integration

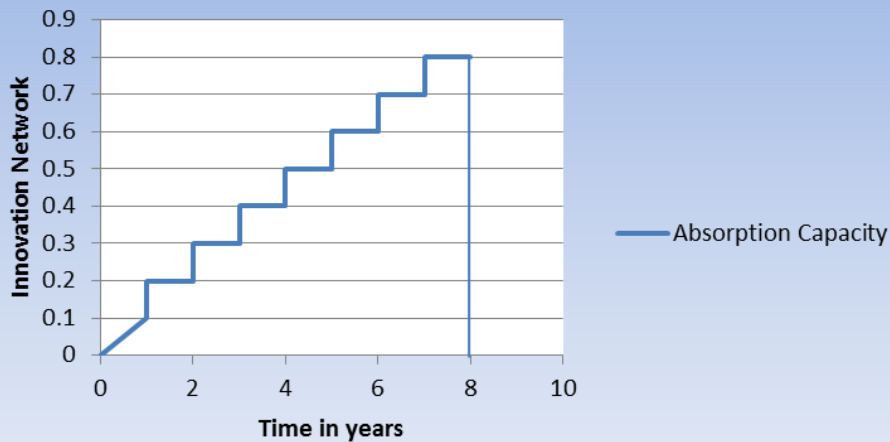**C**

# Threshold of Integration

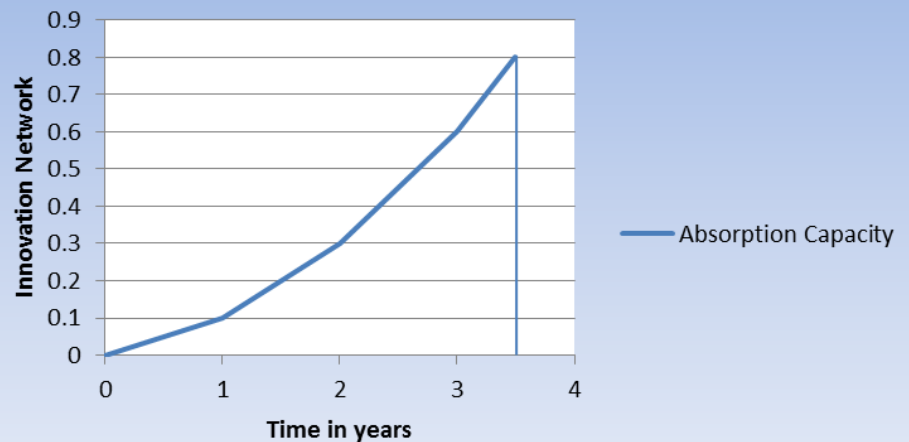

Supplement: MOESM7 [file 9577252]
